# Supplementary material for: Independent and Combined Effects of Prenatal Alcohol Exposure and Prenatal Stress on Fetal HPA Axis Development
Source: MDPI journal article supplement (doi:10.3390/ijms25052690), 2024-02-26
Supplement: s1 [file s1]

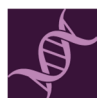

**Table S1.** Primer and Standard Oligo Sequences used in qPCR.

| Gene                             | Primer Sequence                                                                                                                                                                                                                                                                                                                                                                                                                              | Source                                  |
|----------------------------------|----------------------------------------------------------------------------------------------------------------------------------------------------------------------------------------------------------------------------------------------------------------------------------------------------------------------------------------------------------------------------------------------------------------------------------------------|-----------------------------------------|
| <b>11<math>\beta</math>-HSD1</b> | FWD 5'- CTG AAG CAG AGC AAT GGA -3'<br>REV 5'- GCA GAA TAG GCA GCA ACC -3'                                                                                                                                                                                                                                                                                                                                                                   | Validated by melt curve and agarose gel |
| Standard Sequence:               | 5'- CCA TGT GCG CAA AAG CAT GGA AGT CAA CTT CCT CAG TTA CGT GGT CCT GAC TGT AGC<br>TGC CTT GCC CAT GCT GAA GCA GAG CAA TGG AAG CAT TGT TGT CGT CTC CTC TCT GGC TGG<br>GAA AGT GGC TTA TCC AAT GGT TGC TGC CTA TTC TGC AAG CAA GTT TGC TTT GGA TGG GTT<br>CTT CTC CTC CAT CAG AAA GGA ATA TTC AGT GTC CAG GGT CAA TGT A -3'                                                                                                                   |                                         |
| <b>11<math>\beta</math>-HSD2</b> | FWD 5'- CTG TGA ACT CCT TCC CTG -3'<br>REV 5'- GAT GTA GTC CTT GCC GTA -3'                                                                                                                                                                                                                                                                                                                                                                   | Validated by melt curve and agarose gel |
| Standard Sequence:               | 5'- TGC CAT ATC CGT GCT TGG GGG CCT ATG GAA CCT CCA AAG CGG CCG TGG CGC TAC TCA<br>TGG ACA CAT TCA GCT GTG AAC TCC TTC CCT GGG GGG TCA AGG TCA GCA TCA TCC AGC CTG<br>GCT GCT TCA AGA CAG AGT CAG TGA GAA ACG TGG GTC AGT GGG AAA AGC GCA AGC AAT TGC<br>TGC TGG CCA ACC TGC CTC AAG AGC TGC TGC AGG CCT ACG GCA AGG ACT ACA TCG AGC ACT<br>TGC ATG GGC AGT TCC TGC ACT CGC TAC GCC TGG CCA TGT CCG ACC TCA CCC CAG TTG TAG<br>ATG -3'       |                                         |
| <b>CRH</b>                       | FWD 5'- GAA AGG AAG ACA ACC TCC AGA G -3'<br>REV 5'- ATG TTA GGG GCA CTC GCT T -3'                                                                                                                                                                                                                                                                                                                                                           | Validated by melt curve and agarose gel |
| Standard Sequence:               | 5'- AGA CCA AGT CCA TTG AGA GAC TGA GGG GAA AGA GAG GAG AGA AAG AAA AAG AGA GTG<br>GGA ACA GTA AAG AGA AAG GAA GAC AAC CTC CAG AGA AAG CCC CCG GAG ACG TCT CTC TGC<br>AGA GAG GCG GCA GCA CCC GGC TCA CCT GCG AAG CGC CTG GGA AGC GAG TGC CCC TAA CAT<br>GCG GCT GCC GCT GCT TGT GTC CGC GGG AGT CCT GCT GGT GGC TCT CCT GCC CTG CCC GCC<br>ATG CAG GGC G -3'                                                                                |                                         |
| <b>B2M</b>                       | FWD 5'- TGC TGT CTC CAT GTT TGA TGT ATC T -3'<br>REV 5'- TCT CTG CTC CCC ACC TCT AAG T -3'                                                                                                                                                                                                                                                                                                                                                   | [62]                                    |
| Standard Sequence:               | 5'- AAT ATT GAT ATG CTT ATA CAC TTA CAC TTT ATG CAC AAA ATG TAG GGT TAT AAT AAT GTT<br>AAC ATG GAC ATG ATC TTC TTT ATA ATT CTA CTT TGA GTG CTG TCT CCA TGT TTG ATG TAT<br>CTG AGC AGG TTG CTC CAC AGG TAG CTC TAG GAG GGC TGG CAA CTT AGA GGT GGG GAG CAG<br>AGA ATT CTC TTA TCC AAC ATC AAC ATC TTG GTC AGA TTT GAA CTC TTC AAT CTC TTG CAC<br>TCA AAG CTT GTT AAG ATA GTT AAG CGT GCA TAA GTT AAC TTC CAA TTT ACA TAC TCT GCT<br>TAG A -3' |                                         |
| <b>GAPDH</b>                     | FWD 5'- TGC ACC ACC AAC TGC TTA GC -3'<br>REV 5'- GGC ATG GAC TGT GGT CAT GAG -3'                                                                                                                                                                                                                                                                                                                                                            | [62]                                    |
| Standard Sequence:               | 5'- TCA TCA TCT CTG CCC CCT CTG CTG ATG CCC CCA TGT TCG TCA TGG GTG TGA ACC ATG AGA<br>AGT ATG ACA ACA GCC TCA AGA TCA TCA GCA ATG CCT CCT GCA CCA CCA ACT GCT TAG CAC<br>CCC TGG CCA AGG TCA TCC ATG ACA ACT TTG GTA TCG TGG AAG GAC TCA TGA CCA CAG TCC<br>ATG CCA TCA CTG CCA CCC AGA AGA CTG TGG ATG GCC CCT CCG GGA AAC TGT GGC GTG ATG<br>GCC GCG GGG CTC TCC AGA ACA TCA TCC CTG CCT CTA CTG GCG CTG CCA AGG CTG TGG GCA<br>AGG T -3' |                                         |
| <b>ARPC3</b>                     | FWD 5'- CCT GGT TTT CCA CTT AAC GCA -3'<br>REV 5'- AAT AGG CTC TCA TCA CTT CAT CTT -3'                                                                                                                                                                                                                                                                                                                                                       | [84]                                    |
| Standard Sequence:               | 5'- ATT TCT GAA TGT CTG AAG AAA CTG CAA AAG TGC AAT TCC AAA AGC CAA GGT GAG AAA<br>GAA ATG TAT ACG CTG GGA ATC ACT AAT TTT CCC ATT CCT GGA GAG CCT GGT TTT CCA CTT<br>AAC GCA ATT TAT GCC AAA CCT GCA AAC AAA CAG GAA GAT GAA GTG ATG AGA GCC TAT TTA<br>CAA CAG CTA AGG CAA GAG ACT GGA CTG AGA CTT TGT GAG AAA GTT TTC GAC CCT CAG AAT<br>GAT AAA CCC AGC AAG TGG TGG ACT TGC TTT GTG AAG AGA CA -3'                                       |                                         |

**Table S2.** Predictors of pCRH expression: sensitivity analysis.

|         | <b>PSS-V1</b>  | <b>AAD</b>              | <b>Tobacco</b> | <b>Marijuana</b> |
|---------|----------------|-------------------------|----------------|------------------|
|         | <i>β</i> (SE)  | <i>β</i> (SE)           | <i>β</i> (SE)  | <i>β</i> (SE)    |
|         |                | <b>Gene pCRH (N=90)</b> |                |                  |
| Model 1 | 0.007(0.002)** | -0.06(0.15)             | --             | --               |
| Model 2 | 0.007(0.002)** | 0.02(0.16)              | -0.05(0.08)    | -0.05(0.04)      |
| Model 3 | 0.007(0.002)** | 0.002(0.16)             | -0.04(0.08)    | -0.04(0.04)      |

AAD, absolute alcohol (ounces) per day; PSS-V1, Perceived Stress Scale at visit 1.  
\*\* *p*<0.01.  
Model 1: Alcohol measure AAD and PSS-V1.  
Model 2: Alcohol measure AAD, PSS-V1, tobacco use, marijuana use.  
Model 3: Alcohol measure AAD, PSS-V1, tobacco use, marijuana use, race, education, and Hispanic ethnicity.
